# Supplementary material for: Local Control of Brain Metastasis: Treatment Outcome of Focal Brain Treatments in Relation to Subtypes
Source: PubMed Central journal article supplement — J Breast Cancer. 2015 Mar 27;18(1):29–35. doi: 10.4048/jbc.2015.18.1.29 (PMC4381120; doi:10.4048/jbc.2015.18.1.29), 2015-03-27
Supplement: jbc-18-29-s001.pdf [file jbc-18-29-s001.pdf]

**Supplementary Table 1.** Multivariate analyses for overall survival after brain metastasis and brain metastasis-specific survival after brain metastasis

| Factor                     | OSBM             |                 | BMSS             |                 |
|----------------------------|------------------|-----------------|------------------|-----------------|
|                            | Hazard ratio     | <i>p</i> -value | Hazard ratio     | <i>p</i> -value |
| Treatment                  |                  | 0.072           |                  | 0.084           |
| FBT                        | Reference        |                 | Reference        |                 |
| Non-FBT                    | 0.66 (0.42–1.04) |                 | 0.57 (0.31–1.08) |                 |
| ER                         |                  | 0.952           |                  |                 |
| Positive                   | Reference        |                 | NA               |                 |
| Negative                   | 0.96 (0.29–3.19) |                 |                  |                 |
| PR                         |                  | 0.001           |                  | 0.002           |
| Positive                   | Reference        |                 | Reference        |                 |
| Negative                   | 0.37 (0.20–0.70) |                 | 0.36 (0.19–0.69) |                 |
| Histologic grade           |                  |                 |                  | 0.116           |
| I, II                      | NA               |                 | Reference        |                 |
| III                        |                  |                 | 0.82 (0.34–1.12) |                 |
| Subtype                    |                  | 0.453           |                  |                 |
| TN                         | Reference        |                 | NA               |                 |
| HR+HER2–                   | 0.80 (0.19–3.28) | 0.755           |                  |                 |
| HR+HER2+                   | 1.11 (0.30–4.14) | 0.878           |                  |                 |
| HR–HER2+                   | 0.66 (0.35–1.27) | 0.215           |                  |                 |
| No. of metastases in brain |                  | 0.02            |                  | 0.028           |
| Multiple (≥5)              | Reference        |                 | Reference        |                 |
| Single                     | 0.43 (0.23–0.80) | 0.008           | 0.40 (0.18–0.90) | 0.026           |
| Oligometastasis (2–4)      | 0.64 (0.40–1.02) | 0.06            | 0.45 (0.23–0.90) | 0.024           |

OSBM= overall survival after brain metastasis; BMSS= brain metastasis-specific survival; FBT = focal brain treatment; ER= estrogen receptor; NA= not associated; PR= progesterone receptor; TN= triple-negative; HR= hormone receptor; HER2= human epidermal growth factor receptor 2.
