# Supplementary material for: Local Control of Brain Metastasis: Treatment Outcome of Focal Brain Treatments in Relation to Subtypes
Source: PubMed Central journal article supplement — J Breast Cancer. 2015 Mar 27;18(1):29–35. doi: 10.4048/jbc.2015.18.1.29 (PMC4381120; doi:10.4048/jbc.2015.18.1.29), 2015-03-27
Supplement: jbc-18-29-s002.pdf [file jbc-18-29-s002.pdf]

Local Control of Brain Metastasis

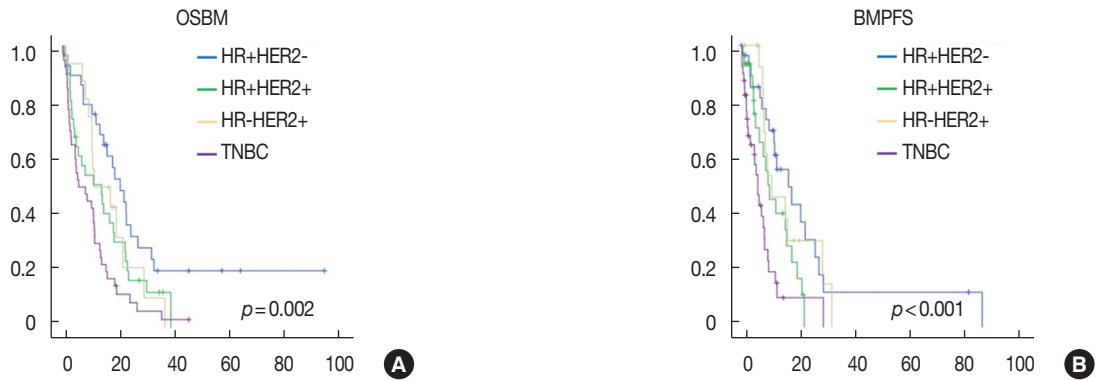

**Supplementary Figure 1.** Kaplan-Meier plots showing overall survival after brain metastasis (OSBM) and brain metastasis-specific progression-free survival (BMPFS), subdivided by subtypes. All  $p$ -values were obtained by the log-rank test. (A) OSBM,  $p=0.002$ . (B) BMPFS,  $p < 0.001$ . HR = hormone receptor; HER2 = human epidermal growth factor receptor 2; TNBC = triple-negative breast cancer.
