# Supplementary material for: Local Control of Brain Metastasis: Treatment Outcome of Focal Brain Treatments in Relation to Subtypes
Source: PubMed Central journal article supplement — J Breast Cancer. 2015 Mar 27;18(1):29–35. doi: 10.4048/jbc.2015.18.1.29 (PMC4381120; doi:10.4048/jbc.2015.18.1.29), 2015-03-27
Supplement: jbc-18-29-s003.pdf [file jbc-18-29-s003.pdf]

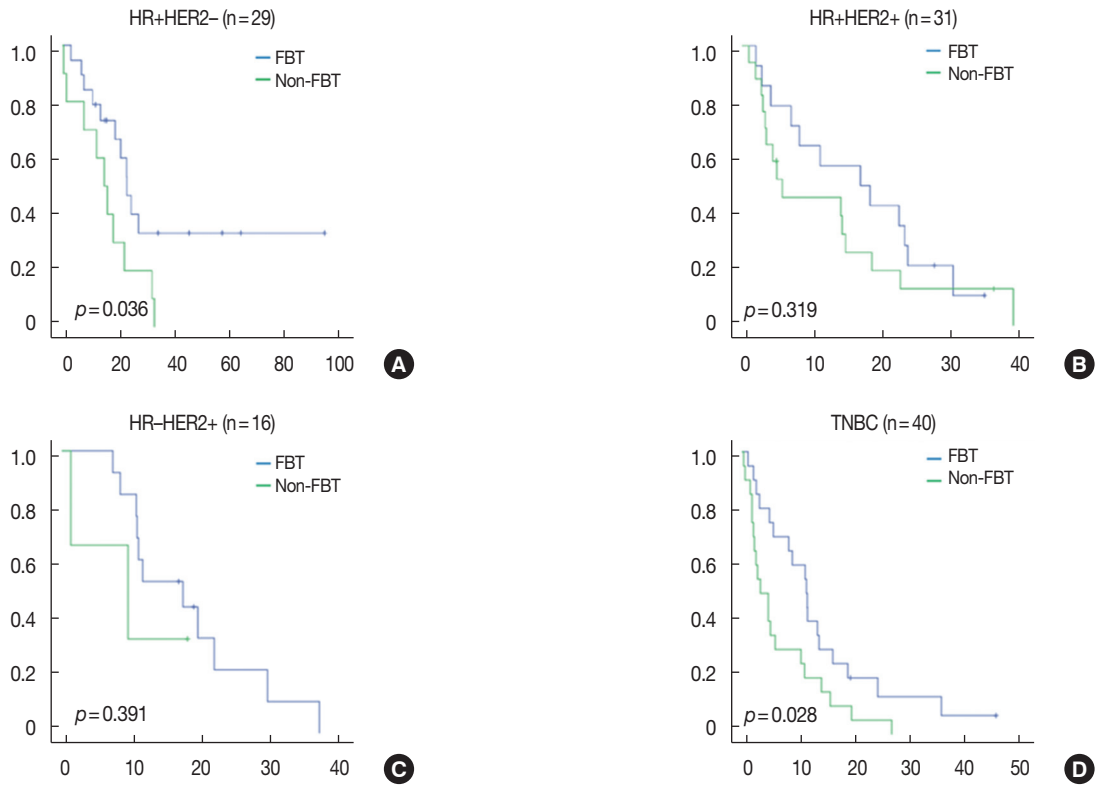

**Supplementary Figure 2.** Kaplan-Meier plots showing overall survival after brain metastasis (OSBM) for types of local treatment, subdivided by subtype. All *p*-values were obtained by the log-rank test. (A) HR+HER2-, *p*=0.036. (B) HR+HER2+, *p*=0.319. (C) HR-HER2+, *p*=0.391. (D) Triple-negative, *p*=0.028.

HR=hormone receptor; HER2=human epidermal growth factor receptor 2; FBT=focal brain treatment; TNBC=triple-negative breast cancer.
